# Supplementary material for: Twelve-Month Follow-Up to a Fully Automated Internet-Based Cognitive Behavior Therapy Intervention for Rural Adults With Depression Symptoms: Single-Arm Longitudinal Study
Source: PubMed Central journal article supplement (PMC7568222; doi:10.2196/21336), 2020-10-02

## Multimedia Appendix 1. CONSORT diagram

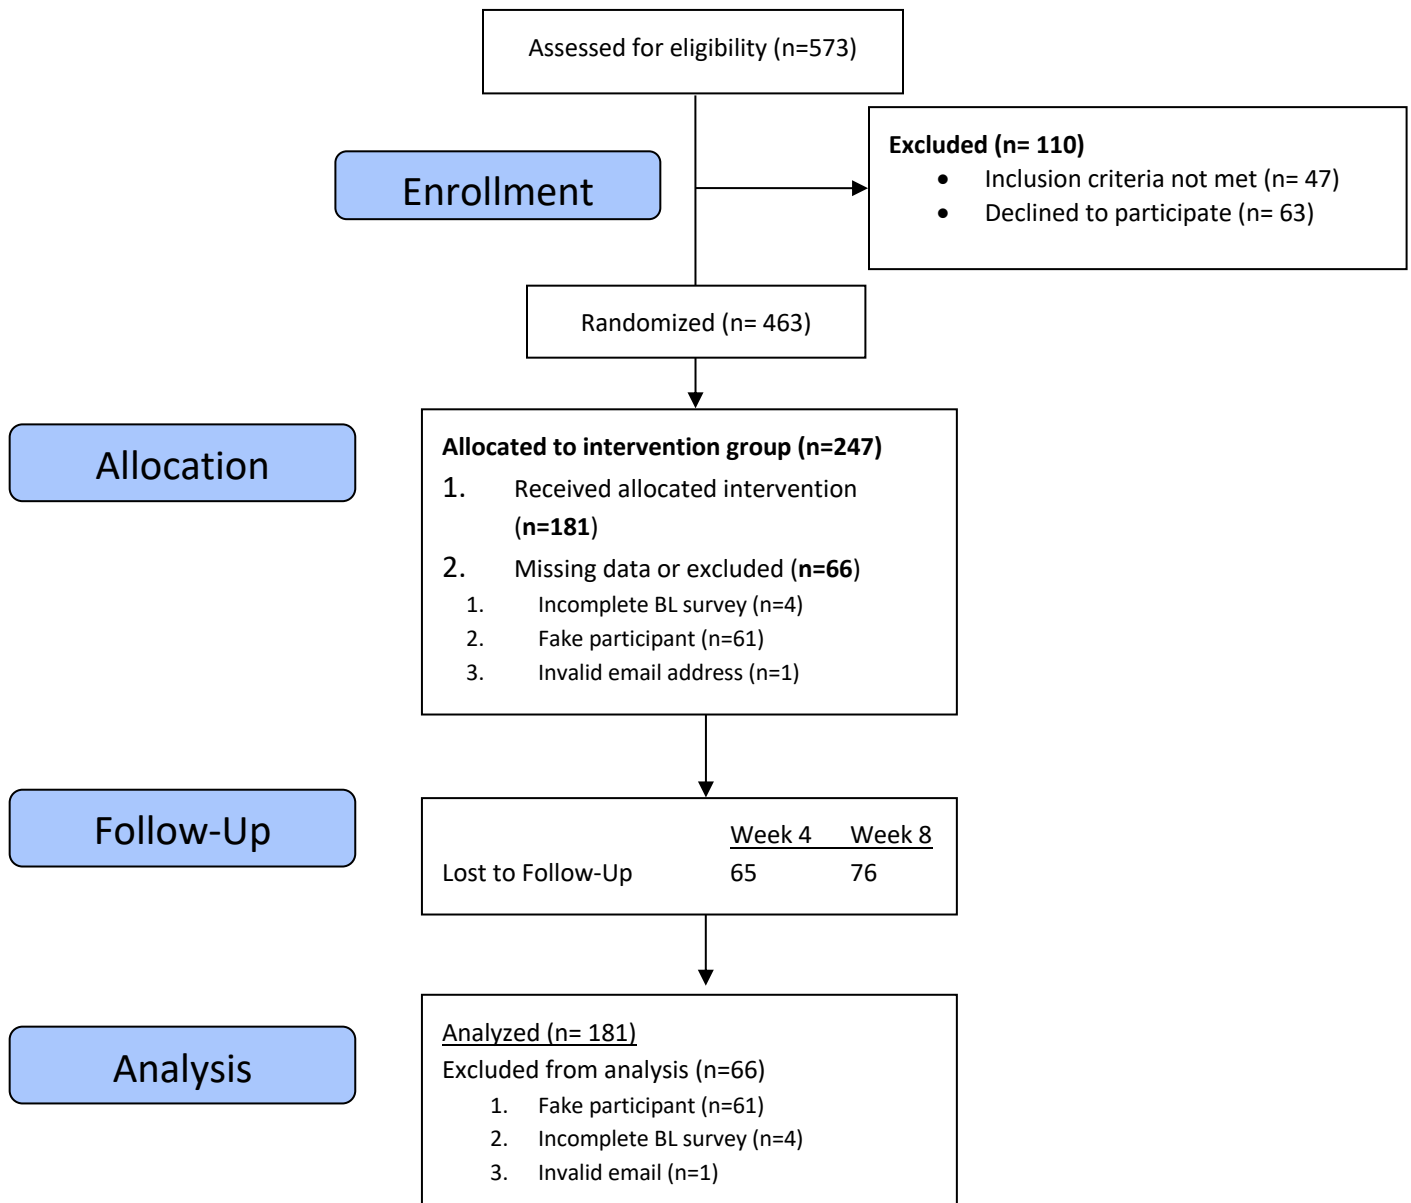

Supplement: jmir_v22i10e21336_app1.pdf [file jmir_v22i10e21336_app1.pdf]
